# Supplementary material for: Amadori rearrangement products as potential biomarkers for inborn errors of amino-acid metabolism
Source: PubMed Central journal article supplement (PMC7979741; doi:10.1038/s42003-021-01909-5), 2021-03-19
Supplement: 42003_2021_1909_MOESM1_ESM.pdf [file 42003_2021_1909_MOESM1_ESM.pdf]

## Supporting information:

### **Amadori rearrangement products as potential biomarkers for inborn errors of amino acid metabolism**

Rianne E. van Outersterp<sup>1</sup>, Sam J. Moons<sup>2</sup>, Udo F.H. Engelke<sup>3</sup>, Herman Bentlage<sup>1</sup>, Tessa M.A. Peters<sup>3</sup>, Arno van Rooij<sup>3</sup>, Marleen C.D.G. Huigen<sup>3</sup>, Siebolt de Boer<sup>3</sup>, Ed van der Heeft<sup>3</sup>, Leo A.J. Kluijtmans<sup>3</sup>, Clara D.M. van Karnebeek<sup>4</sup>, Ron A. Wevers<sup>3</sup>, Giel Berden<sup>1</sup>, Jos Oomens<sup>1,5</sup>, Thomas J. Boltje<sup>2</sup>, Karlien L.M. Coene<sup>3\*§</sup>, Jonathan Martens<sup>1\*§</sup>

<sup>1</sup>Radboud University, Institute for Molecules and Materials, FELIX Laboratory, Toernooiveld 7, 6525 ED, Nijmegen, the Netherlands

<sup>2</sup>Radboud University, Institute for Molecules and Materials, Synthetic Organic Chemistry, Heyendaalseweg 135, 6525 AJ, Nijmegen, The Netherlands

<sup>3</sup>Department of Laboratory Medicine, Translational Metabolic Laboratory, Radboud University Medical Center, Geert Grooteplein Zuid 10, 6525 GA Nijmegen, the Netherlands

<sup>4</sup>Department of Pediatrics, Radboud Centre for Mitochondrial Medicine, Radboud University Medical Centre, Geert Grooteplein Zuid 10, 6525 GA, Nijmegen, Netherlands.

<sup>5</sup>van't Hoff Institute for Molecular Sciences, University of Amsterdam, 1098XH Amsterdam, Science Park 908, The Netherlands

\*corresponding author

§ These authors jointly supervised this work

E-mail: [jonathan.martens@ru.nl](mailto:jonathan.martens@ru.nl), [karlien.coene@radboudumc.nl](mailto:karlien.coene@radboudumc.nl)

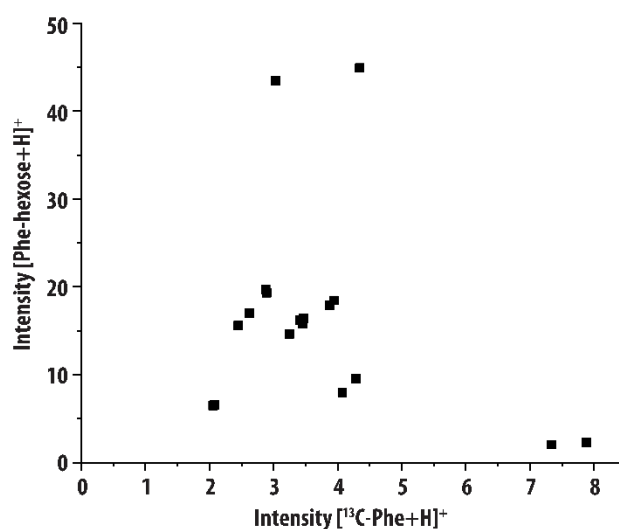

**Figure S1** | Plot of the intensity of protonated Phe-hexose ( $m/z$  328.1391) versus the intensity of protonated  $^{13}\text{C}$ -Phe ( $m/z$  167.0897) observed in nine plasma samples of PKU patients. All signals are normalized on the signal in the quality control sample.

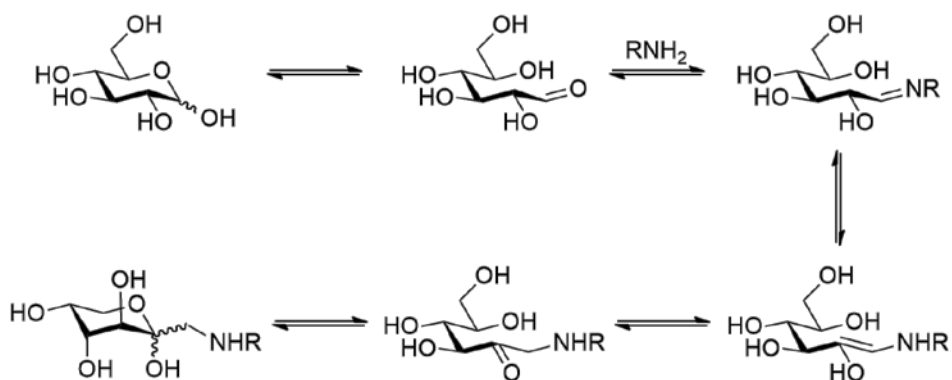

**Scheme S1** | Mechanism of the conjugation of an amino acid (general structure RNH<sub>2</sub>) with glucose and the following Amadori rearrangement transforming the amino acid-glucose conjugate into an Amadori rearrangement product (ARP), via the formation of a Schiff base.

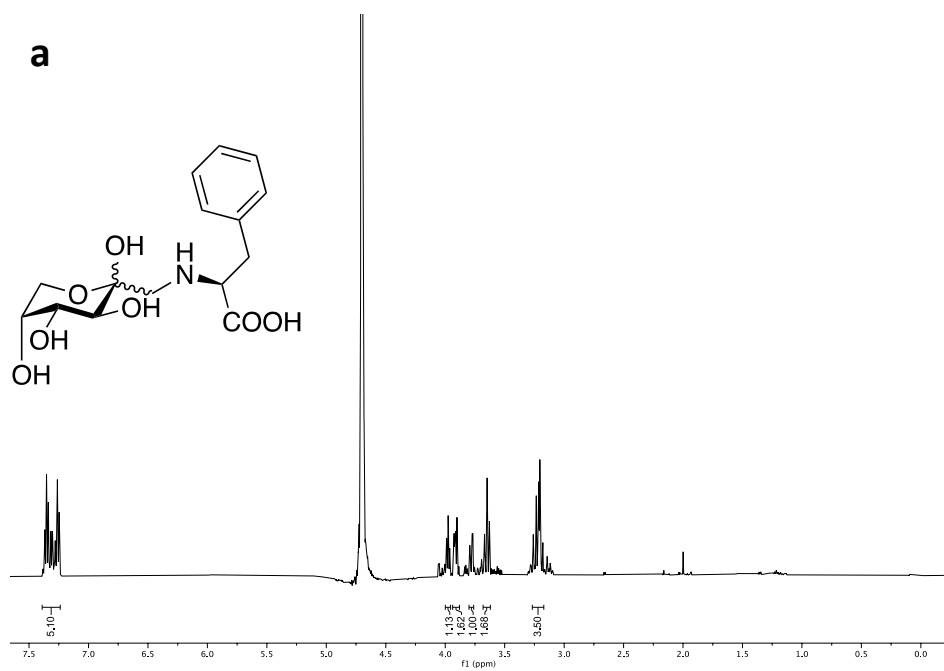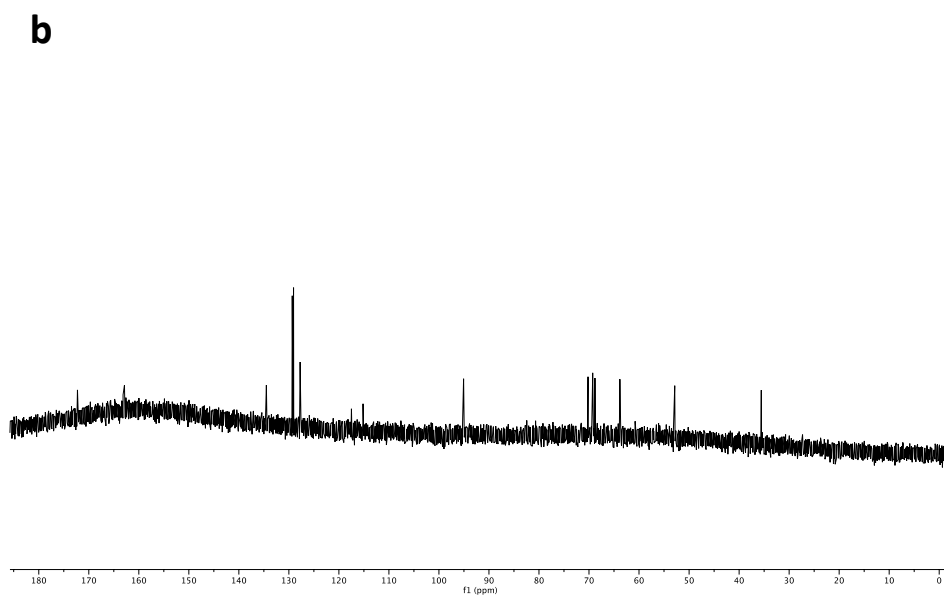

**Figure S2 |  $^1\text{H}$  NMR (a) and  $^{13}\text{C}$  NMR (b) spectrum of the Phe-Glucose reference standard.**

$^1\text{H}$  NMR (500 MHz,  $\text{D}_2\text{O}$ )  $\delta$  7.47 – 7.32 (m, 6H), 4.06 (t,  $J$  = 6.5 Hz, 1H), 4.03 – 3.98 (m, 2H), 3.87 (dd,  $J$  = 9.9, 3.4 Hz, 1H), 3.77 – 3.71 (m, 2H), 3.36 – 3.24 (m, 4H).  $^{13}\text{C}$  NMR (126 MHz,  $\text{D}_2\text{O}$ )  $\delta$  172.25, 162.03, 129.32, 129.07, 127.75, 95.08, 70.19, 69.26, 68.81, 63.88, 63.83, 52.86, 35.93.

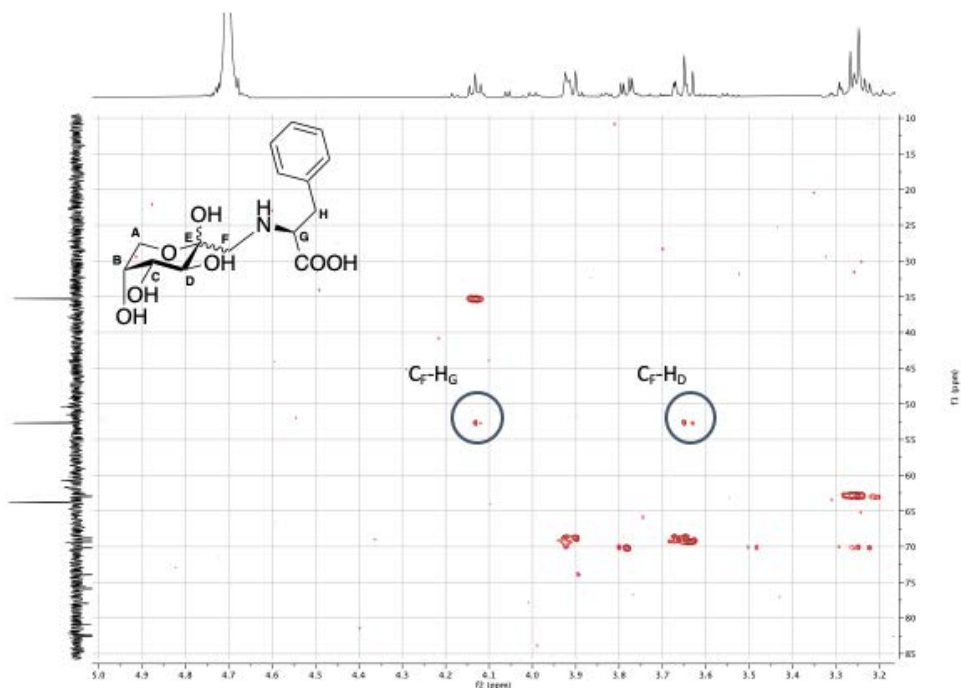

**Figure S3 |  $^1\text{H}$ - $^{13}\text{C}$  HMBC of the Phe-Glucose reference standard.** Long-range couplings are observed between the hexose ( $\text{H}_D$ ), amino acid ( $\text{H}_G$ ) and the bridging methylene ( $\text{C}_F$ )

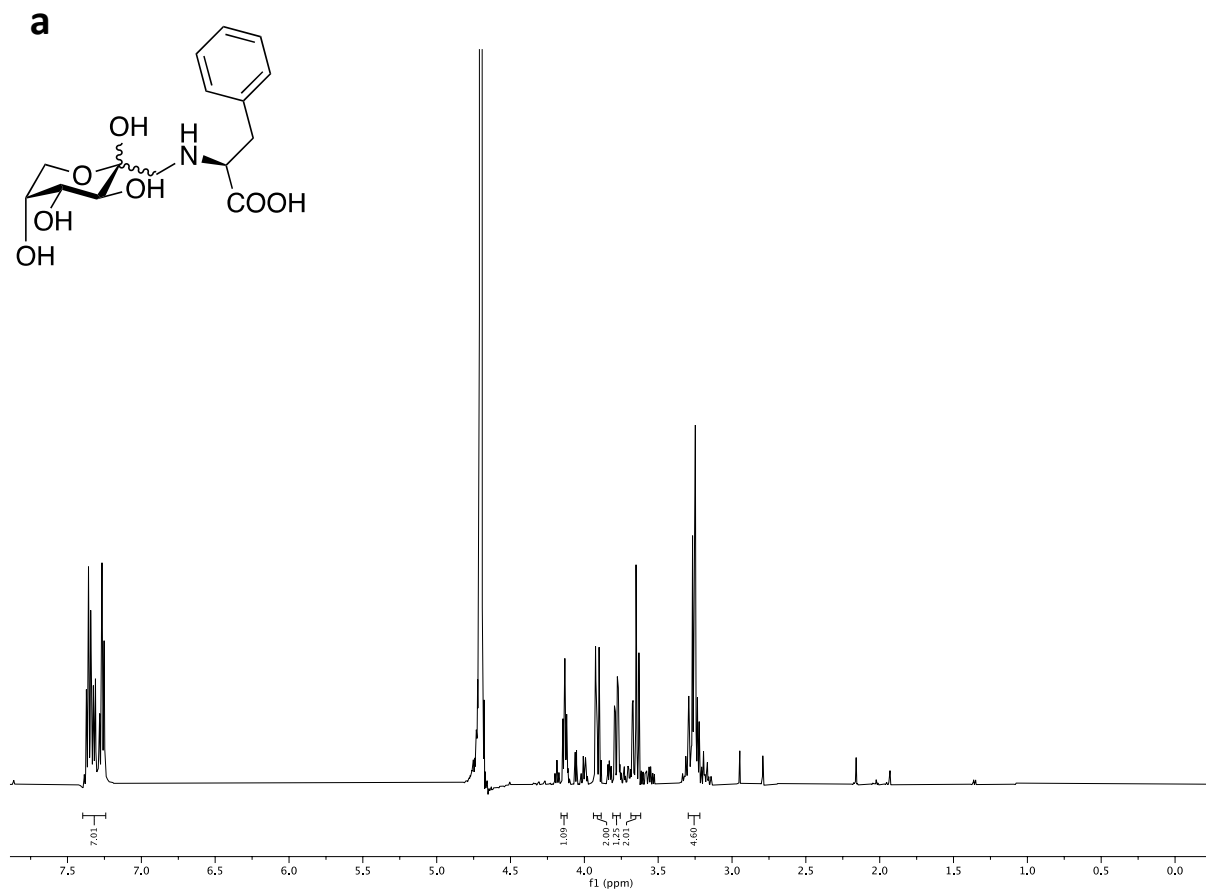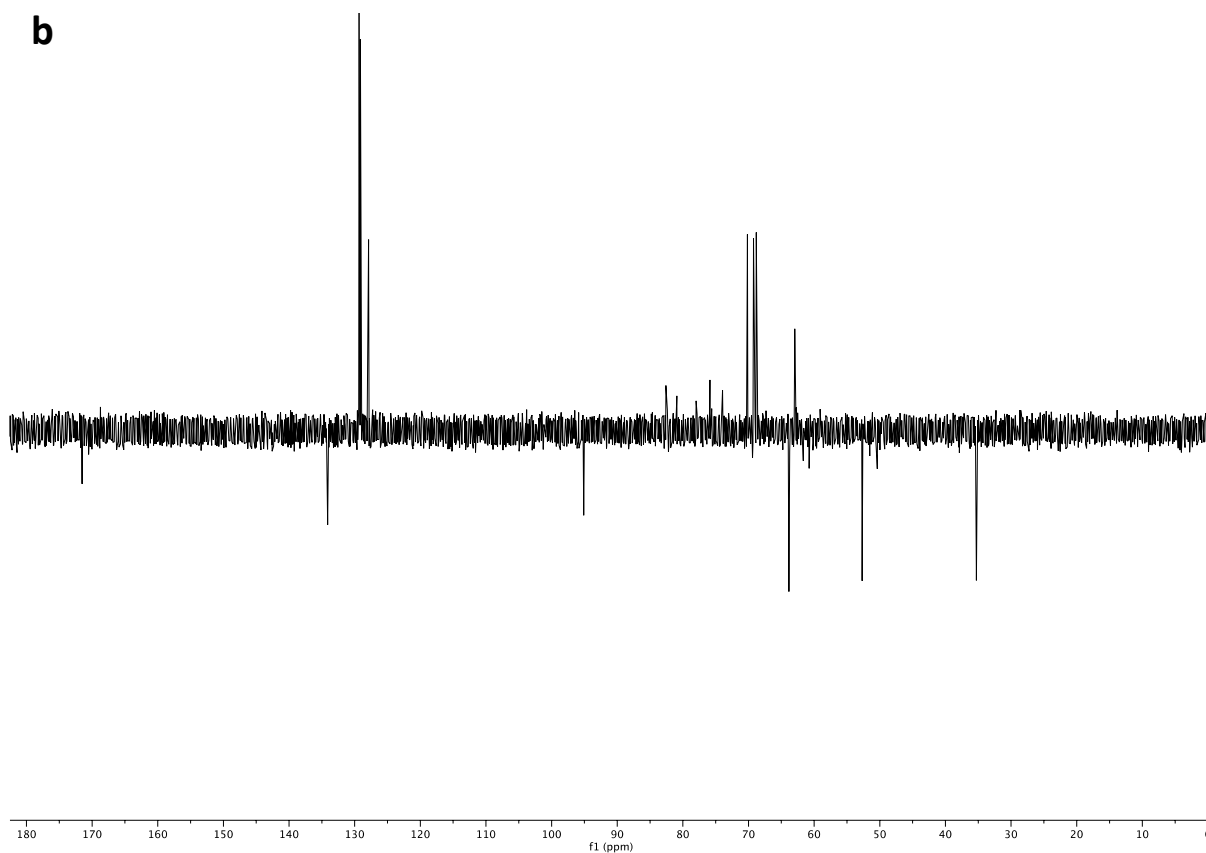

**Figure S4 | <sup>1</sup>H NMR (a) and <sup>13</sup>C NMR (b) spectrum of the Phe-Mannose reference standard. The Phe-Mannose and Phe-glucose reference standards are found to be identical.**

<sup>1</sup>H NMR (500 MHz, D<sub>2</sub>O) δ 7.39 – 7.30 (m, 3H), 7.27 (td, *J* = 8.1, 1.5 Hz, 2H), 4.13 (t, *J* = 6.5 Hz, 1H), 3.95 – 3.86 (m, 2H), 3.78 (dd, *J* = 9.8, 3.4 Hz, 1H), 3.69 – 3.61 (m, 2H), 3.31 – 3.18 (m, 4H). <sup>13</sup>C NMR (126 MHz, D<sub>2</sub>O) δ 171.53, 134.11, 129.34, 129.12, 127.88, 95.10, 70.16, 69.24, 68.81, 63.84, 62.96, 52.70, 35.28.

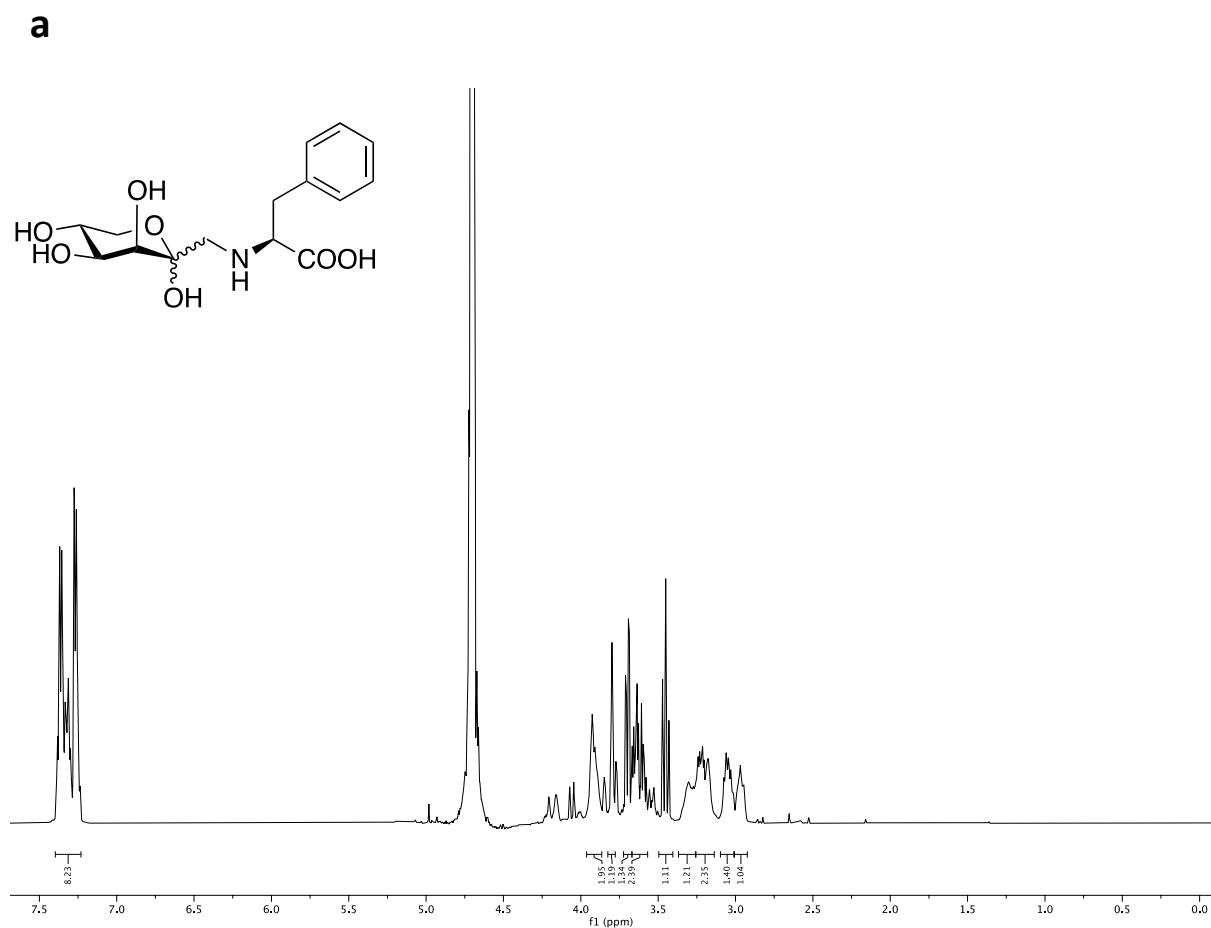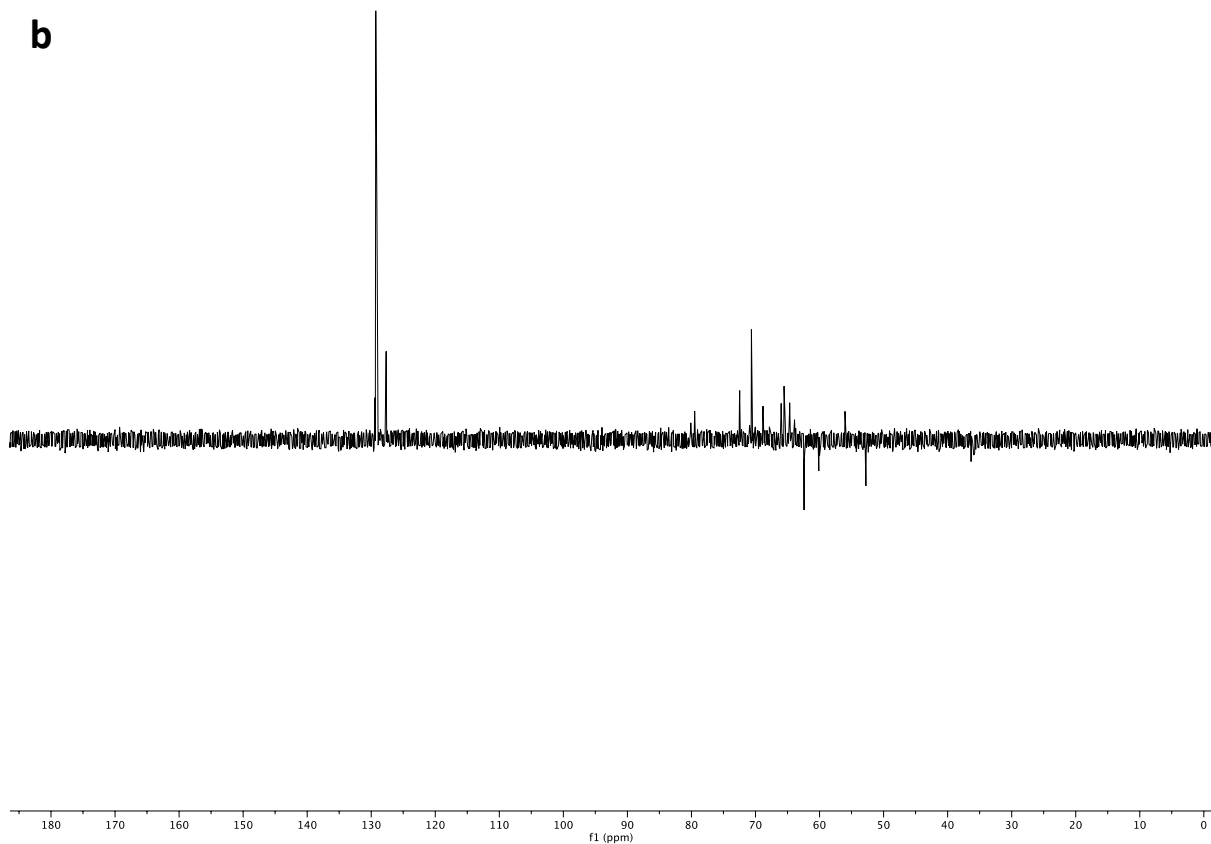

**Figure S5 |  $^1\text{H}$  NMR (a) and  $^{13}\text{C}$  NMR (b) spectrum of the Phe-Galactose reference standard.**  
 $^1\text{H}$  NMR (500 MHz,  $\text{D}_2\text{O}$ )  $\delta$  7.42 – 7.13 (m, 5H), 3.97 – 3.87 (m, 1H), 3.78 (dt,  $J$  = 13.5, 2.2 Hz, 1H), 3.70 (m, 3H), 3.45 (t,  $J$  = 10.2 Hz, 1H), 3.36 – 3.12 (m, 2H), 3.05 (q,  $J$  = 7.9 Hz, 1H), 2.96 (d,  $J$  = 11.6 Hz, 1H).  $^{13}\text{C}$  NMR (126 MHz,  $\text{D}_2\text{O}$ )  $\delta$  171.03, 135.28, 129.29, 129.06, 127.66, 62.41, 60.12, 52.76, 36.33.

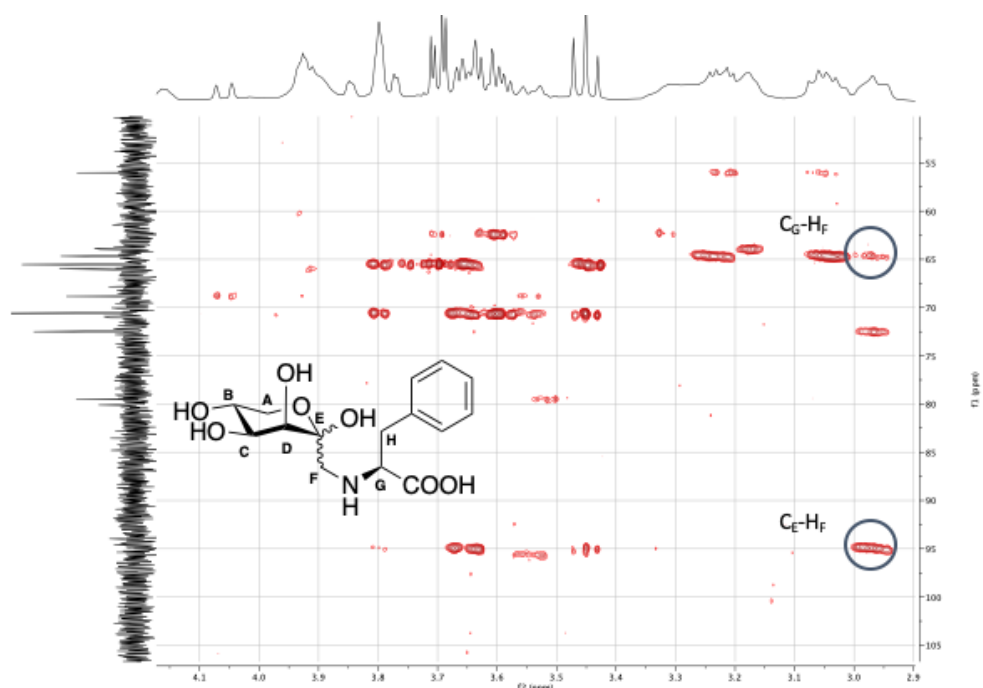

**Figure S6 |  $^1\text{H}$ - $^{13}\text{C}$  HMBC of the Phe-Galactose reference standard.** Long-range couplings are observed between the hexose ( $\text{C}_E$ ), amino acid ( $\text{C}_G$ ) and the bridging methylene ( $\text{H}_F$ )

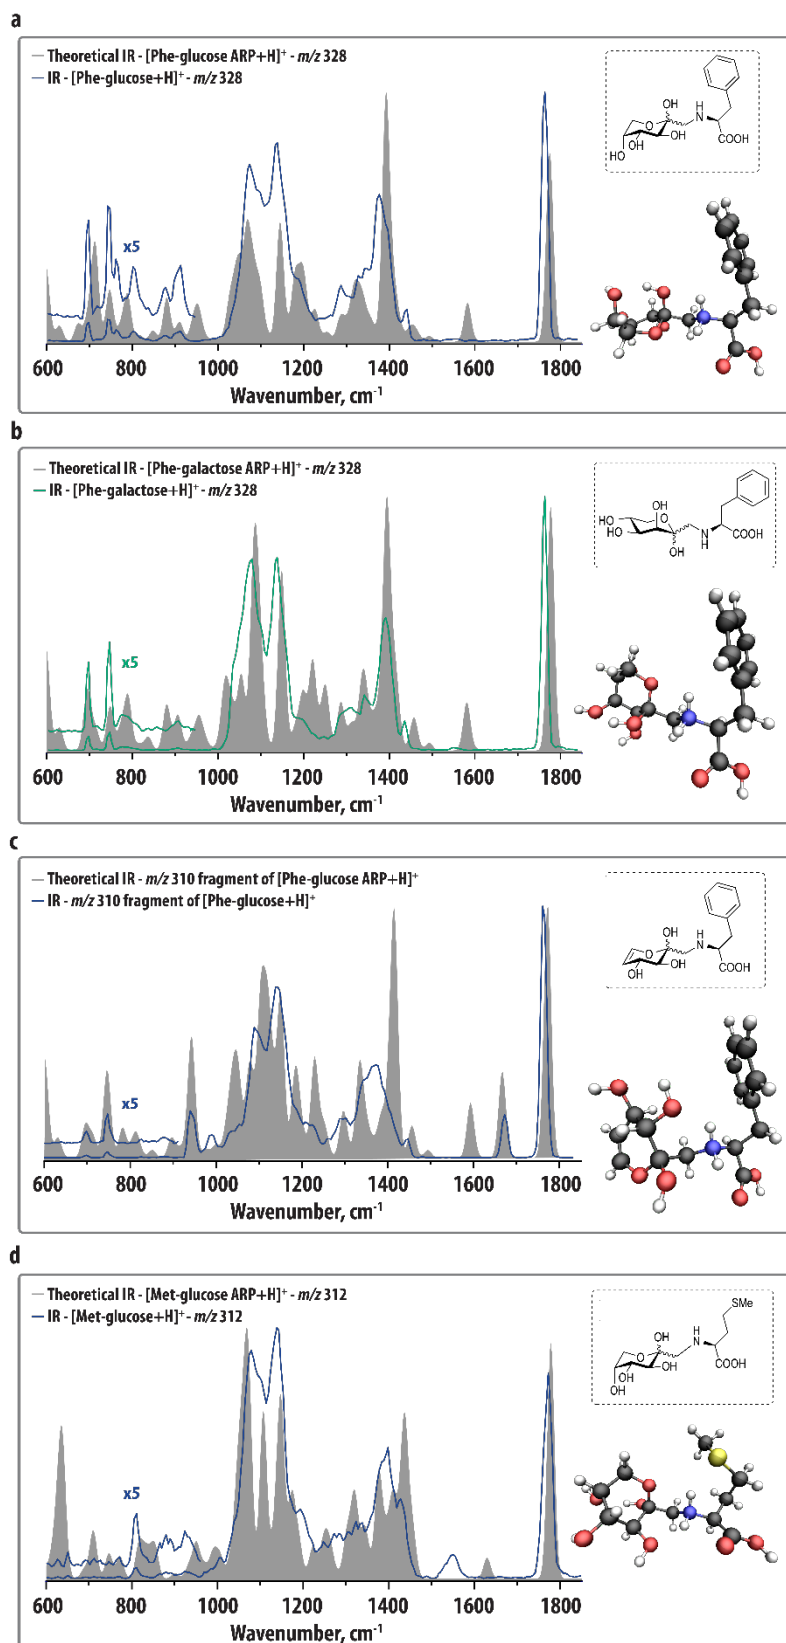

**Figure S7 | Results of quantum-chemical computations.** a-c) Comparison between IRIS spectra of the protonated ions of the a) Phe-glucose, b) Phe-galactose and d) Met-glucose reference standards and quantum-chemically computed IR spectra for each ion. c) Comparison between the IRIS spectrum of the  $m/z$  310 fragment of the protonated ion of the Phe-glucose reference standard and its quantum-chemically computed IR spectrum. Structures of the reference compounds and DFT optimized structures are inlayed in each panel. The predicted peak around  $1600\text{ cm}^{-1}$  is not observed for all Phe-hexose ions, which is likely due to it being too low in intensity to induce dissociation of the probed ions with the laser power used. This peak is not used for structural assignment. Each IR spectrum was normalized on the largest peak.



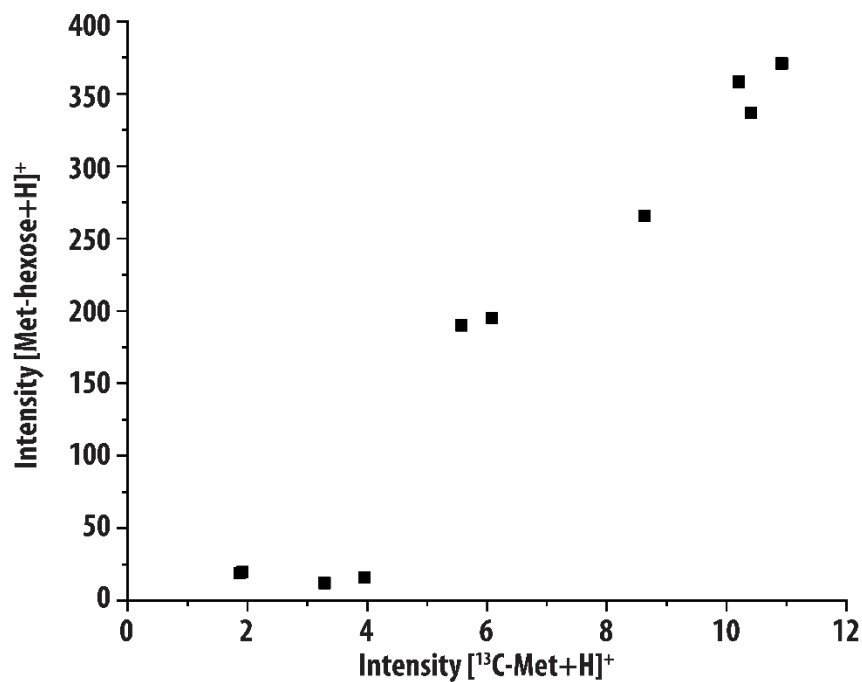

**Figure S8** | Plot of the intensity of protonated Met-hexose ( $m/z$  312.1111) versus the intensity of protonated  $^{13}\text{C}$ -Met ( $m/z$  151.0619) observed in plasma samples of CBS patients. All signals are normalized on the signal in the quality control sample.

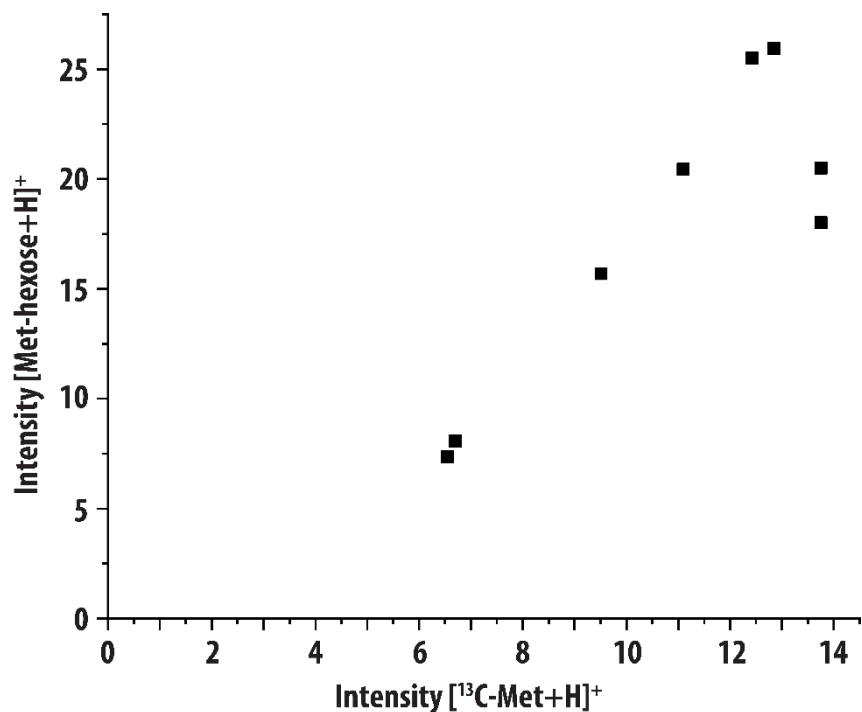

**Figure S9** | Plot of the intensity of protonated Met-hexose ( $m/z$  312.1111) versus the intensity of protonated  $^{13}\text{C}$ -Met ( $m/z$  151.0619) observed in plasma samples of MAT patients. All signals are normalized on the signal in the quality control sample.

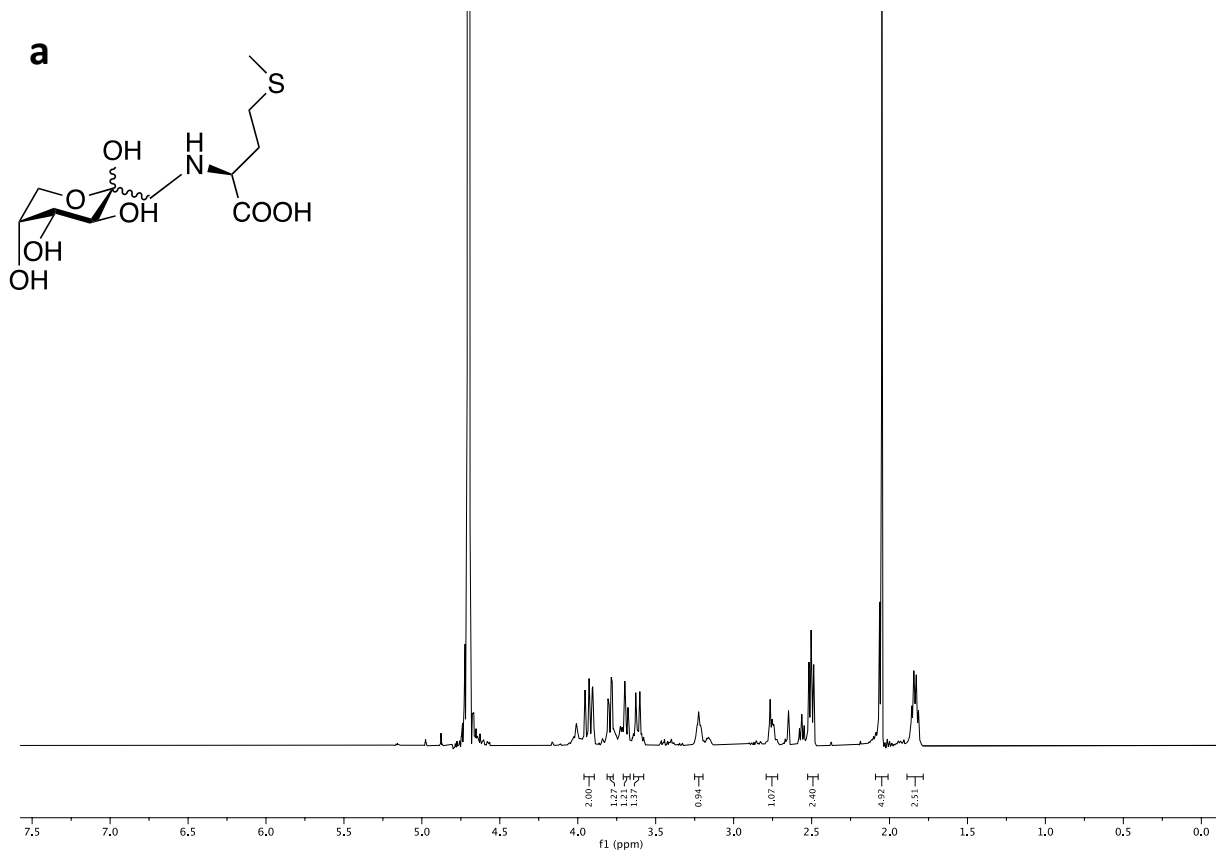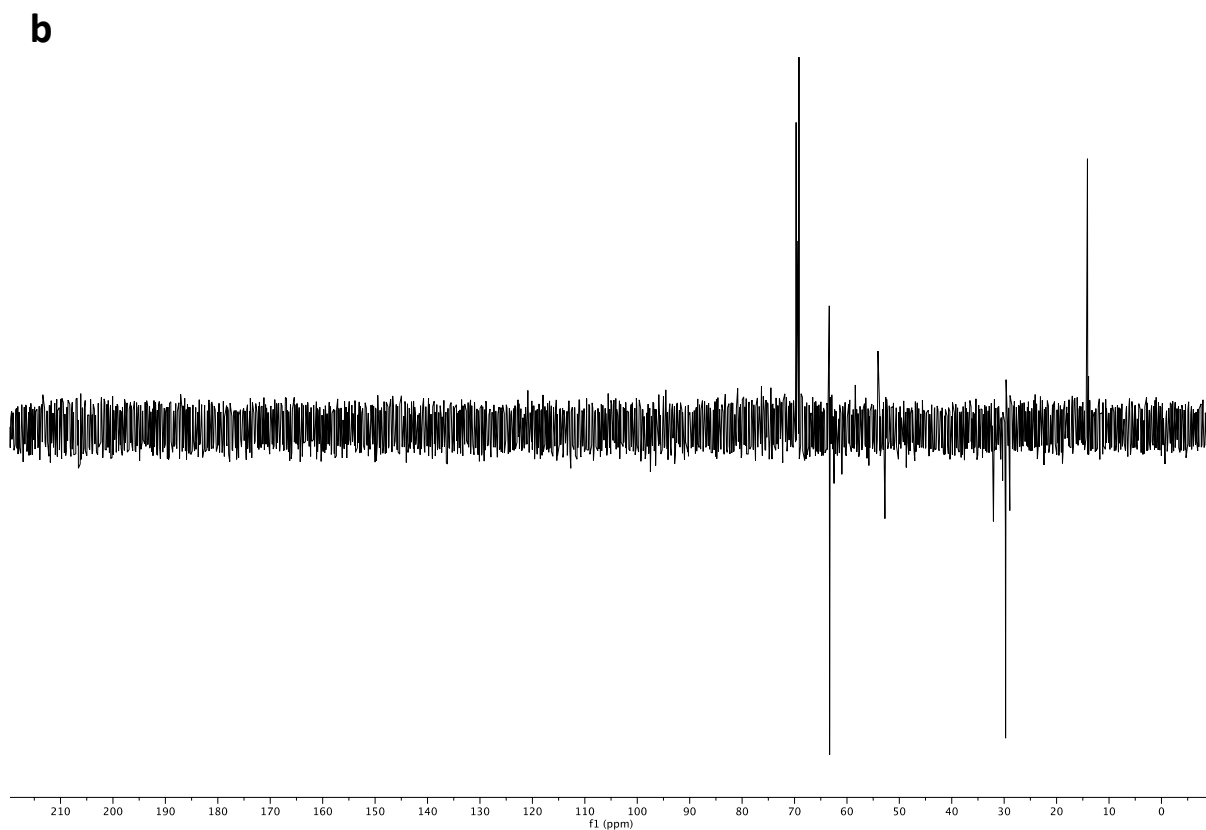

**Figure S10 |  $^1\text{H}$  NMR (a) and  $^{13}\text{C}$  NMR (b) spectrum of the Met-Glucose reference standard.  $^1\text{H}$  NMR (500 MHz,  $\text{D}_2\text{O}$ )  $\delta$  3.97 – 3.88 (m, 2H), 3.79 (dd,  $J = 10.0, 3.4$  Hz, 1H), 3.72 – 3.66 (m, 1H), 3.61 (dd,  $J = 12.8, 1.9$  Hz, 1H), 3.22 (d,  $J = 8.0$  Hz, 1H), 2.80 – 2.72 (m, 1H), 2.50 (dd,  $J = 8.9, 6.4$  Hz, 2H), 2.06 (d,  $J = 7.0$  Hz, 3H), 1.84 (s, 2H).  $^{13}\text{C}$  NMR (126 MHz,  $\text{D}_2\text{O}$ )  $\delta$  97.56, 69.69, 69.31, 69.14, 63.37, 63.31, 52.75, 32.05, 29.74, 14.11.**

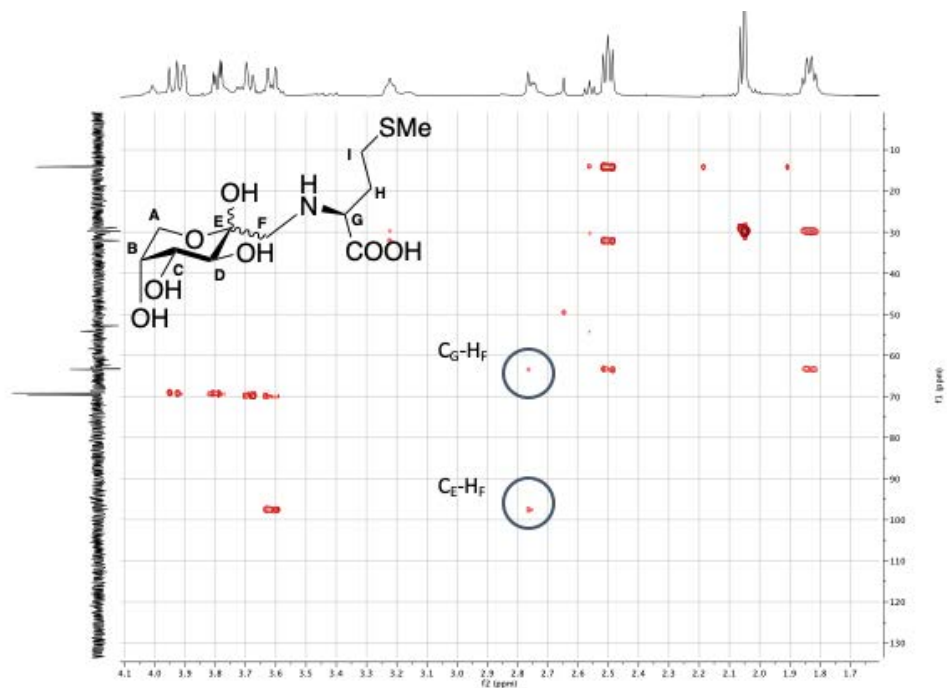

**Figure S11 |  $^1\text{H}$ - $^{13}\text{C}$  HMBC of the Met-Glucose reference standard.** Long-range couplings are observed between the hexose (E<sub>D</sub>), amino acid (C<sub>G</sub>) and the bridging methylene (H<sub>F</sub>)

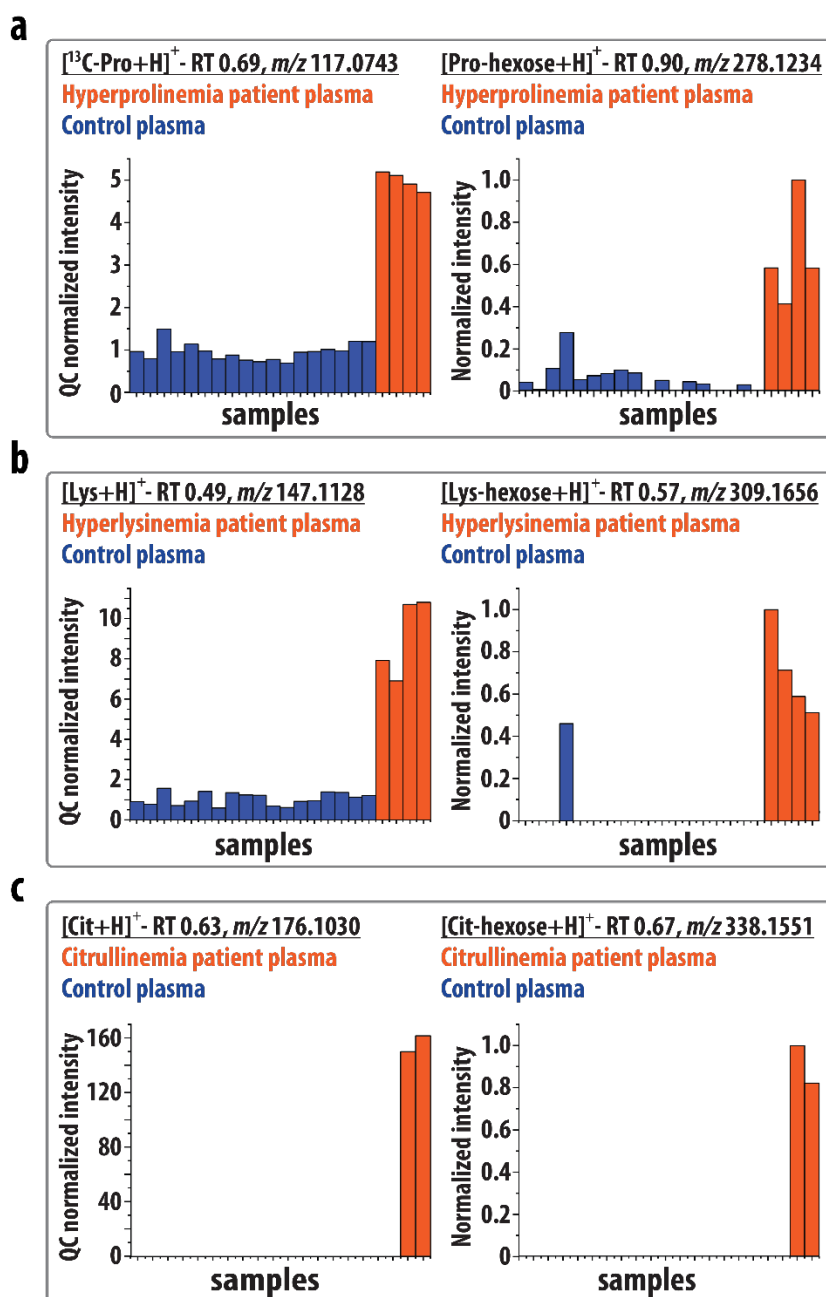

**Figure S12** | (a) Intensity plots of protonated  $^{13}\text{C}$ -proline (Pro,  $m/z$  117.0743), and the Pro-hexose conjugate ( $m/z$  278.1234) observed in two plasma samples of hyperprolinemia patients (red) and 14 controls. The average fold changes (patient/control) are 5 and 12, respectively. (b) Intensity plots of protonated lysine (Lys,  $m/z$  147.1128) and the Lys-hexose conjugate ( $m/z$  309.1656) observed in two plasma samples of hyperlysinemia patients (red) and 14 controls. The average fold changes (patient/control) are 9 and 28, respectively. In (a) and (b) the first ten bars (from left to right) represent controls which were analyzed as one technical replicate whereas the next 4 bars represent controls measured as two technical replicates (shown as consecutive bars in the figures). The ordering of samples is the same between left and right panels. (c) Intensity plot of protonated citrulline (Cit,  $m/z$  176.1030), and the Cit-hexose conjugate ( $m/z$  338.1551) observed in one plasma sample of a citrullinemia patient (red, two technical replicates) and 17 controls (blue, one technical replicate for 16 controls and two technical duplicate for one control). The average fold changes (patient/control) is 155 for Cit. The average fold change of the Cit-hexose could not be determined as it is not detected in any of the controls. The ordering of samples is the same in both panels.

**Table S1 | Characteristics of patients corresponding to the studied samples.** Samples are listed in the order in which they are presented in the manuscript.

| Sample | Disorder                                        | Amino acid level | Sex    | Age         |
|--------|-------------------------------------------------|------------------|--------|-------------|
| 1      | hyperphenylalanine/phenylketonuria              | Phe 384 uM       | Male   | 13 days     |
| 2      | DHPR deficiency                                 | Phe 355 uM       | Female | 7 months    |
| 3      | hyperphenylalanine/phenylketonuria              | Phe 528 uM       | Female | 10 years    |
| 4      | hyperphenylalanine/phenylketonuria              | Phe 241 uM       | Female | 19 years    |
| 5      | hyperphenylalanine/phenylketonuria              | Phe 359 uM       | Female | 6 months    |
| 6      | classic phenylketonuria                         | Phe 1243 uM      | Male   | 25 years    |
| 7      | classic phenylketonuria                         | Phe 337 uM       | Female | 8 years     |
| 8      | hyperphenylalanine/phenylketonuria, untreated   | Phe 585 uM       | Male   | 7 days      |
| 9      | classic phenylketonuria, untreated              | Phe 2232 uM      | Male   | 7 days      |
| 10     | cystathionine beta synthase deficiency          | Met 383 uM       | Male   | 59 years    |
| 11     | cystathionine beta synthase deficiency          | Met 591 uM       | Male   | 21 years    |
| 12     | cystathionine beta synthase deficiency          | Not available    | Male   | 57 years    |
| 13     | cystathionine beta synthase deficiency          | Met 117 uM       | Female | 22 years    |
| 14     | cystathionine beta synthase deficiency          | Met 674 uM       | Female | Age unknown |
| 15     | methionine adenosyltransferase I/III deficiency | Met 469 uM       | Female | 4 years     |
| 16     | methionine adenosyltransferase I/III deficiency | Met 503 uM       | Female | 4 years     |
| 17     | methionine adenosyltransferase I/III deficiency | Met 172 uM       | Female | 1 month     |
| 18     | methionine adenosyltransferase I/III deficiency | Met 464 uM       | Male   | 1 year      |
| 19     | Hyperprolinemia type II                         | Pro 2648 uM      | Female | 10 years    |
| 20     | Hyperprolinemia type II                         | Pro 1974 uM      | Male   | 17 years    |
| 21     | Hyperlysinemia type I                           | Lys 1006 uM      | Male   | 3 years     |
| 22     | Hyperlysinemia type I                           | Lys 1483 uM      | Male   | 34 years    |
| 23     | Citrullinemia type I                            | Cit 2951 uM      | Male   | 4 years     |
