# Supplementary material for: Amadori rearrangement products as potential biomarkers for inborn errors of amino-acid metabolism
Source: PubMed Central journal article supplement (PMC7979741; doi:10.1038/s42003-021-01909-5), 2021-03-19
Supplement: 42003_2021_1909_MOESM2_ESM.pdf [file 42003_2021_1909_MOESM2_ESM.pdf]

## Description of Additional Supplementary Files

**File name:** Supplementary Data 1

**Description:** LC-MS data underlying the histograms in Figures 1 and 3.

**File name:** Supplementary Data 2

**Description:** Data underlying the MS/MS spectra in Figure 1.

**File name:** Supplementary Data 3

**Description:** Data underlying the experimental IR spectra in Figure 1 and 3.

**File name:** Supplementary Data 4

**Description:** Data underlying the theoretical IR spectra and coordinates of the quantum-chemically optimized structures in Figure S6.
